# Supplementary material for: Correction: Porphyrin overdrive rewires cancer cell metabolism
Source: PubMed Central journal article supplement (PMC11106523; doi:10.26508/lsa.202402816), 2024-05-20
Supplement: LSA-2024-02816_review_history.pdf [file LSA-2024-02816_review_history.pdf]

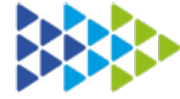

Life Science Alliance

# Correction: Porphyrin overdrive rewires cancer cell metabolism

Swamy Adapa, Gregory Hunter, Narmin Amin, Christopher Marinescu, Andrew Borsky, Elizabeth Sagatys, Said Sebti, Gary Reuther, Gloria Ferreira, and Rays Jiang

DOI: <https://doi.org/10.26508/lsa.202402816>

Corresponding author(s): Rays Jiang, University of South Florida

---

## Review Timeline:

Submission Date:

2024-05-10

Accepted:

2024-05-14

---

Scientific Editor: Eric Sawey, PhD

## Transaction Report:

(Note: With the exception of the correction of typographical or spelling errors that could be a source of ambiguity, letters and reports are not edited. The original formatting of letters and referee reports may not be reflected in this compilation.)

May 14, 2024

RE: Life Science Alliance Manuscript #LSA-2024-02816

Dr. Rays H.Y. Jiang  
University of South Florida  
Global Health  
3720 Spectrum Blvd  
Tampa, FL 33612

Dear Dr. Jiang,

Thank you for submitting your Correction entitled "Correction: Porphyrin overdrive rewires cancer cell metabolism".

\*\*\*IMPORTANT: If you will be unreachable at any time, please provide us with the email address of an alternate author. Failure to respond to routine queries may lead to unavoidable delays in publication.\*\*\*

You can contact the journal office with any questions, [contact@life-science-alliance.org](mailto:contact@life-science-alliance.org)

Sincerely,

Eric Sawey, PhD  
Executive Editor  
Life Science Alliance  
<http://www.lsjournal.org>

May 14, 2024

RE: Life Science Alliance Manuscript #LSA-2024-02816

Dr. Rays H.Y. Jiang  
University of South Florida  
Global Health  
3720 Spectrum Blvd  
Tampa, FL 33612

Dear Dr. Jiang,

Thank you for submitting your Correction entitled "Correction: Porphyrin overdrive rewires cancer cell metabolism".

\*\*\*IMPORTANT: If you will be unreachable at any time, please provide us with the email address of an alternate author. Failure to respond to routine queries may lead to unavoidable delays in publication.\*\*\*

You can contact the journal office with any questions, [contact@life-science-alliance.org](mailto:contact@life-science-alliance.org)

Sincerely,

Eric Sawey, PhD  
Executive Editor  
Life Science Alliance  
<http://www.lsjournal.org>
